# Supplementary material for: Physical properties and ion dynamics in composites of the organic ionic plastic crystal N-ethyl-N-methylpyrrolidinium bis(fluorosulfonyl)amide with lithium sulphonamide functional acrylate polymer nanoparticles
Source: Royal Society of Chemistry journal article supplement (doi:10.1039/d3ta05698h), 2024-01-01

### SUPPORTING INFORMATION

**S1** Nyquist plot of EIS spectra of the composite with 20 v% polymer particles as prepared at 30 °C and 50 °C.

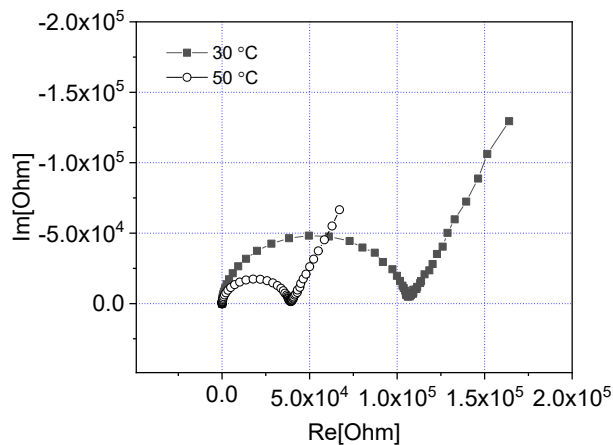

**S2** Static  $^1\text{H}$  NMR with variable temperature experiments of a)  $\text{C}_2\text{mpyrFSI}$  and b) composite with 20v% of polymer nanoparticles (CF-20-NPs).

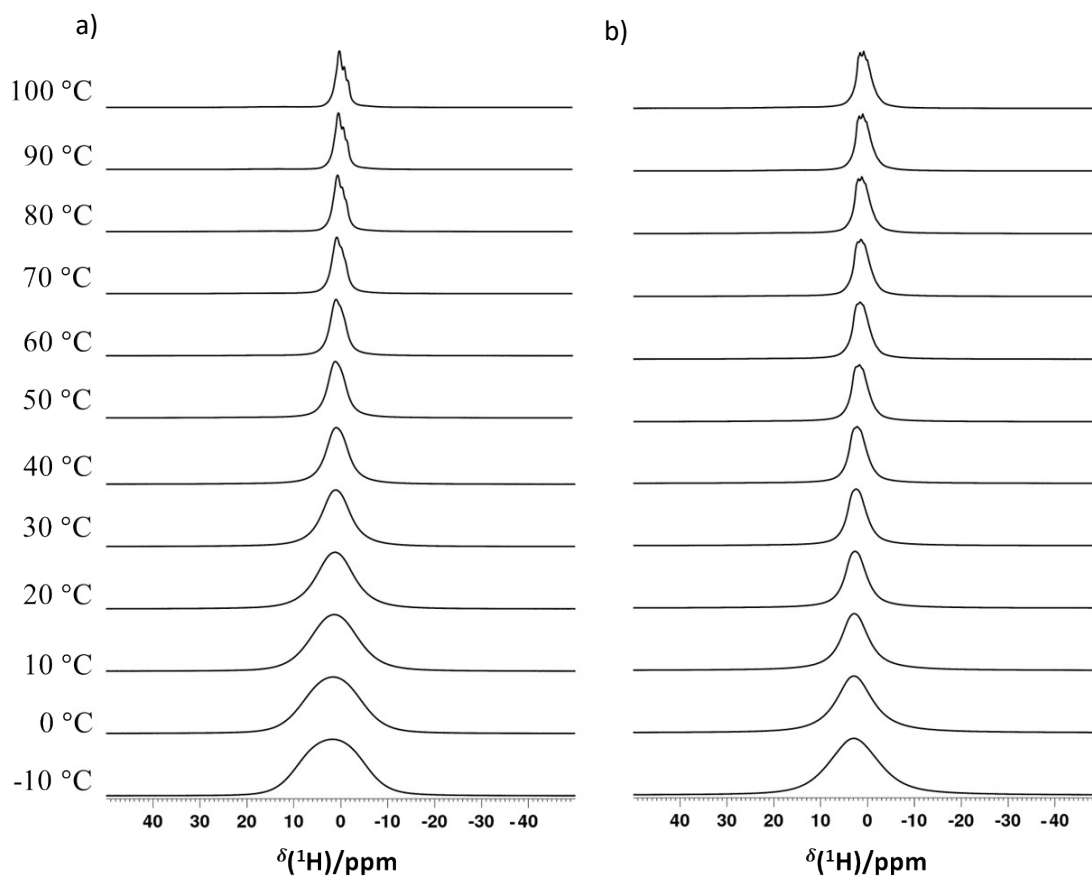

**S3** Static  $^7\text{Li}$  NMR with variable temperature experiments of the composite with 20 v% of polymer nanoparticles (CF-20-NPs).

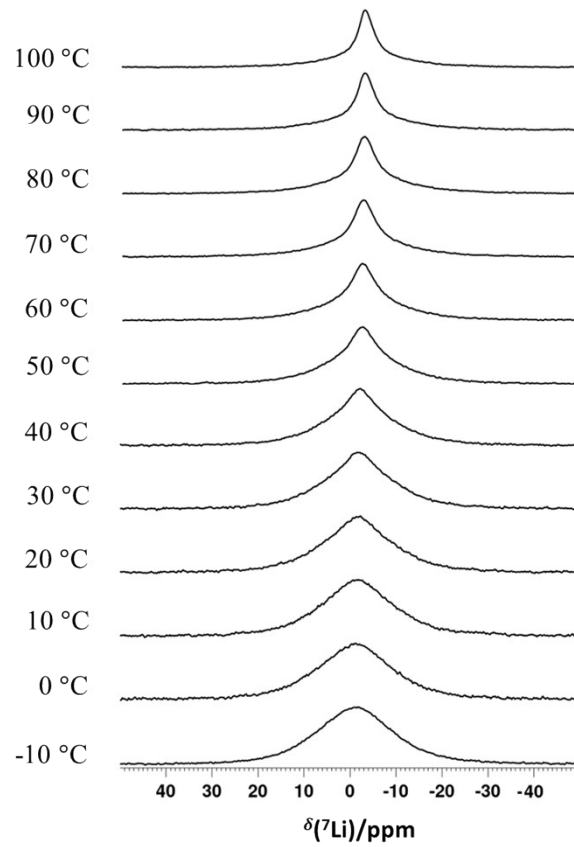

**S4**  $^7\text{Li}$   $T_1$ -BPP Fit for a) polymer nanoparticles and b) composite with 20 v% of polymer nanoparticles (CF-20-NPs).

a)

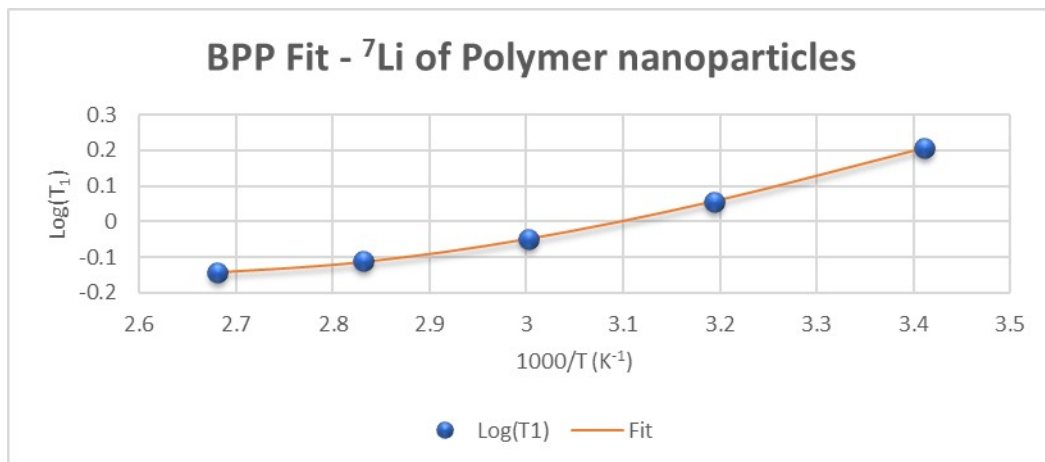

b)C

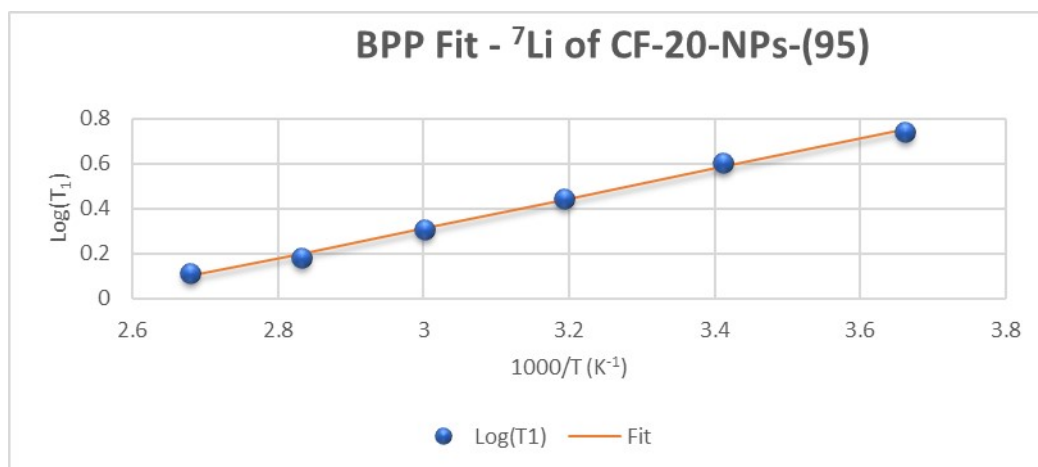

Supplement: d3ta05698h1.pdf [file d3ta05698h1.pdf]
